# Supplementary material for: Early Outpatient Treatment of COVID-19: A Retrospective Analysis of 392 Cases in Italy
Source: MDPI journal article supplement (doi:10.3390/jcm11206138), 2022-10-18
Supplement: s1 [file s1]

# EARLY OUTPATIENT TREATMENT OF COVID-19: A RETROSPECTIVE ANALYSIS OF 392 CASES IN ITALY

## Questionnaire for physicians

Name \_\_\_\_\_ date \_\_\_\_\_

Answer please to the following questions having in mind your attitudes and experience during the time interval included in the study (1/11/20-31/3/21).

1. How often did you prescribe **vitamins and supplements** in:

|                          | never | sometimes | often | always |
|--------------------------|-------|-----------|-------|--------|
| <b>Covid-19 stage 0</b>  |       |           |       |        |
| <b>Covid-19 stage 1</b>  |       |           |       |        |
| <b>Covid-19 stage 2a</b> |       |           |       |        |
| <b>Covid-19 stage 2b</b> |       |           |       |        |

*(for each stage, only one choice allowed)*

2. How often did you prescribe **aspirin** in:

|                          | never | sometimes | often | always |
|--------------------------|-------|-----------|-------|--------|
| <b>Covid-19 stage 0</b>  |       |           |       |        |
| <b>Covid-19 stage 1</b>  |       |           |       |        |
| <b>Covid-19 stage 2a</b> |       |           |       |        |
| <b>Covid-19 stage 2b</b> |       |           |       |        |

*(for each stage, only one choice allowed)*

2.1 List please criteria supporting your choice (for example presence/absence of any signs/symptoms, risk factors, indications/contraindications)

3. How often did you prescribe **antibiotics** in:

|                          | never | sometimes | often | always |
|--------------------------|-------|-----------|-------|--------|
| <b>Covid-19 stage 0</b>  |       |           |       |        |
| <b>Covid-19 stage 1</b>  |       |           |       |        |
| <b>Covid-19 stage 2a</b> |       |           |       |        |
| <b>Covid-19 stage 2b</b> |       |           |       |        |

*(for each stage, only one choice allowed)*

3.1 List please criteria supporting your choice (for example presence/absence of any signs/symptoms, risk factors, indications/contraindications)

4. How often did you prescribe **hydroxychloroquine** in:

|                          | <b>never</b> | <b>sometimes</b> | <b>often</b> | <b>always</b> |
|--------------------------|--------------|------------------|--------------|---------------|
| <b>Covid-19 stage 0</b>  |              |                  |              |               |
| <b>Covid-19 stage 1</b>  |              |                  |              |               |
| <b>Covid-19 stage 2a</b> |              |                  |              |               |
| <b>Covid-19 stage 2b</b> |              |                  |              |               |

*(for each stage, only one choice allowed)*

4.1 List please criteria supporting your choice (for example presence/absence of any signs/symptoms, risk factors, indications/contraindications)

5. How often did you prescribe **ivermectin** in:

|                          | <b>never</b> | <b>sometimes</b> | <b>often</b> | <b>always</b> |
|--------------------------|--------------|------------------|--------------|---------------|
| <b>Covid-19 stage 0</b>  |              |                  |              |               |
| <b>Covid-19 stage 1</b>  |              |                  |              |               |
| <b>Covid-19 stage 2a</b> |              |                  |              |               |
| <b>Covid-19 stage 2b</b> |              |                  |              |               |

*(for each stage, only one choice allowed)*

5.1 List please criteria supporting your choice (for example presence/absence of any signs/symptoms, risk factors, indications/contraindications)

6. How often did you prescribe **colchicine** in:

|                          | <b>never</b> | <b>sometimes</b> | <b>often</b> | <b>always</b> |
|--------------------------|--------------|------------------|--------------|---------------|
| <b>Covid-19 stage 0</b>  |              |                  |              |               |
| <b>Covid-19 stage 1</b>  |              |                  |              |               |
| <b>Covid-19 stage 2a</b> |              |                  |              |               |
| <b>Covid-19 stage 2b</b> |              |                  |              |               |

*(for each stage, only one choice allowed)*

6.1 List please criteria supporting your choice (for example presence/absence of any signs/symptoms, risk factors, indications/contraindications)

7. How often did you prescribe **enoxaparin** in:

|                          | <b>never</b> | <b>sometimes</b> | <b>often</b> | <b>always</b> |
|--------------------------|--------------|------------------|--------------|---------------|
| <b>Covid-19 stage 0</b>  |              |                  |              |               |
| <b>Covid-19 stage 1</b>  |              |                  |              |               |
| <b>Covid-19 stage 2a</b> |              |                  |              |               |
| <b>Covid-19 stage 2b</b> |              |                  |              |               |

*(for each stage, only one choice allowed)*

7.1 List please criteria supporting your choice (for example presence/absence of any signs/symptoms, risk factors, indications/contraindications)

8. How often did you prescribe **glucocorticoids** in:

|                          | <b>never</b> | <b>sometimes</b> | <b>often</b> | <b>always</b> |
|--------------------------|--------------|------------------|--------------|---------------|
| <b>Covid-19 stage 0</b>  |              |                  |              |               |
| <b>Covid-19 stage 1</b>  |              |                  |              |               |
| <b>Covid-19 stage 2a</b> |              |                  |              |               |
| <b>Covid-19 stage 2b</b> |              |                  |              |               |

*(for each stage, only one choice allowed)*

8.1 List please criteria supporting your choice (for example presence/absence of any signs/symptoms, risk factors, indications/contraindications)

9. How often did you observe any suspect adverse reactions with each of the following drugs?

|                                 | never | uncommonly | commonly | very commonly |
|---------------------------------|-------|------------|----------|---------------|
|                                 |       | <1%        | 1-10%    | >10%          |
| <b>vitamins and supplements</b> |       |            |          |               |
| <b>aspirin</b>                  |       |            |          |               |
| <b>antibiotics</b>              |       |            |          |               |
| <b>hydroxychloroquine</b>       |       |            |          |               |
| <b>ivermectin</b>               |       |            |          |               |
| <b>colchicine</b>               |       |            |          |               |
| <b>enoxaparin</b>               |       |            |          |               |
| <b>glucocorticoids</b>          |       |            |          |               |

10. In case you observed any suspect adverse reactions, please indicate whether they were:

|                                                                                                                                                                                                            |  |
|------------------------------------------------------------------------------------------------------------------------------------------------------------------------------------------------------------|--|
| <b>Grade 1: Mild</b><br><i>transient or mild discomfort (&lt; 48 hours); no medical intervention or therapy required</i>                                                                                   |  |
| <b>Grade 2: Moderate</b><br><i>mild to moderate limitation in activity; some assistance may be needed; no or minimal medical intervention or therapy required</i>                                          |  |
| <b>Grade 3: Severe</b><br><i>marked limitation in activity, some assistance usually required; medical intervention or therapy required, hospitalizations possible</i>                                      |  |
| <b>Grade 4: Life threatening</b><br><i>extreme limitation in activity, significant assistance required; significant medical intervention or therapy required, hospitalization or hospice care probable</i> |  |

11. In case you observed grade 2 or higher suspect adverse reactions, please briefly describe the case(s):
